# Supplementary material for: Childbirth Satisfaction during the COVID-19 Pandemic in a Hospital in Southwestern Spain
Source: MDPI journal article supplement (doi:10.3390/ijerph19159636), 2022-08-05
Supplement: s1 [file s1]

**Supplementary File S1.** Women excluded vs women included in the final analysis.

| Variables                                                               | Women<br>Included<br>n= 116 | Women<br>excluded<br>n=30 | p                  |
|-------------------------------------------------------------------------|-----------------------------|---------------------------|--------------------|
| <b>Age <math>\bar{x}</math> (SD)</b>                                    | 32.08 (4.68)                | 32.09 (6.23)              | 0.993 <sup>1</sup> |
| <b>Country of origin n (%)</b>                                          |                             |                           |                    |
| Spain                                                                   | 109 (94.0)                  | 26 (86.7)                 | 0.369 <sup>2</sup> |
| Other                                                                   | 7 (6.0)                     | 4 (13.3)                  |                    |
| <b>Education n (%)</b>                                                  |                             |                           |                    |
| No studies/primary                                                      | 40 (34.5)                   | 10 (33.3)                 | 0.234 <sup>3</sup> |
| Secondary                                                               | 53 (45.7)                   | 7 (23.3)                  |                    |
| University/postgraduate                                                 | 23 (19.8)                   | 13 (43.3)                 |                    |
| <b>Employment situation n (%)</b>                                       |                             |                           |                    |
| Student                                                                 | 2 (1.7)                     | 0 (0)                     | 0.573 <sup>2</sup> |
| Unemployed                                                              | 41 (35.3)                   | 14 (46.7)                 |                    |
| Work for others                                                         | 65 (56.0)                   | 16 (53.3)                 |                    |
| Own-account work                                                        | 8 (6.9)                     | 0 (0)                     |                    |
| <b>Stable partner n (%)</b>                                             | 116 (100.0)                 | 30 (100)                  | 1.000 <sup>3</sup> |
| <b>Maternal Education n (%)</b>                                         |                             |                           |                    |
| Yes                                                                     | 46 (39.7)                   | 12 (40.0)                 | 0.963 <sup>3</sup> |
| No                                                                      | 70 (60.3)                   | 18 (60.0)                 |                    |
| <b>Number of professionals who provided care, n (%)</b>                 |                             |                           |                    |
| 1 - 2                                                                   | 37 (31.9)                   | 13 (43.3)                 | 0.329 <sup>2</sup> |
| 3 - 5                                                                   | 67 (57.8)                   | 13 (43.3)                 |                    |
| > 5                                                                     | 26 (10.4)                   | 4 (13.3)                  |                    |
| <b>Number of professionals who performed vaginal examination, n (%)</b> |                             |                           |                    |
| 0 - 2                                                                   | 63 (54.3)                   | 16 (53.3)                 | 0.852 <sup>2</sup> |
| 3 - 5                                                                   | 52 (44.8)                   | 14 (46.7)                 |                    |
| > 5                                                                     | 1 (0.9)                     | 0 (0)                     |                    |
| <b>Labor Companion, n (%)</b>                                           |                             |                           |                    |
| Partner                                                                 | 103 (88.8)                  | 23 (76.7)                 | 0.092 <sup>2</sup> |
| Other relative                                                          | 4 (3.4)                     | 0 (0)                     |                    |
| Nobody                                                                  | 9 (7.8)                     | 7 (23.3)                  |                    |
| <b>Puerperium Companion, n (%)</b>                                      |                             |                           |                    |
| Partner                                                                 | 111 (95.7)                  | 27 (90.0)                 | 0.327 <sup>2</sup> |
| Other relative                                                          | 2 (1.7)                     | 0 (0)                     |                    |
| Nobody                                                                  | 3 (2.6)                     | 3 (10.0)                  |                    |
| <b>The companion was chosen prior to childbirth, n (%)</b>              | 104 (89.7)                  | 30 (100)                  | 0.460 <sup>3</sup> |
| <b>Planned epidural analgesia before childbirth, n (%)</b>              | 85 (73.3)                   | 24 (80.0)                 | 0.618 <sup>3</sup> |
| <b>Planned mode of new-born feeding (prior to birth)</b>                |                             |                           |                    |
| Exclusive breastfeeding                                                 | 91 (78.4)                   | 23 (76.7)                 | 0.653 <sup>2</sup> |
| Partial breastfeeding                                                   | 11 (9.5)                    | 2 (6.7)                   |                    |
| Formula feeding                                                         | 14 (12.1)                   | 5 (16.6)                  |                    |

<sup>1</sup> t-student test; <sup>2</sup> Fisher test; <sup>3</sup> Chi square test
